# Supplementary material for: Metabolomic Comparison of Patients With Colorectal Cancer at Different Anticancer Treatment Stages
Source: PubMed Central journal article supplement (PMC8855116; doi:10.3389/fonc.2021.574318), 2022-02-04
Supplement: Image_1.pdf [file Image_1.pdf]

**Title: Metabolomic comparison of patients with colorectal cancer at different anti-cancer treatment stages**

Running title: Metabolic profiling of CRC patients

Zhuofei Li<sup>1</sup>, Xingming Deng<sup>1</sup>, Jun Luo<sup>1</sup>, Yunpeng Lei<sup>1</sup>, Xinghan Jin<sup>1</sup>, Guoqing Lv<sup>1</sup>

<sup>1</sup> Department of Gastrointestinal Surgery, Peking University Shenzhen Hospital, Shenzhen 518033, PR China.

Corresponding authors

Guoqing Lv

Department of Gastrointestinal Surgery, Peking University Shenzhen Hospital, Shenzhen 518033, PR China.

[lgq\\_bdsy@163.com](mailto:lgq_bdsy@163.com)

Figure S1 Representative spectra of urine samples

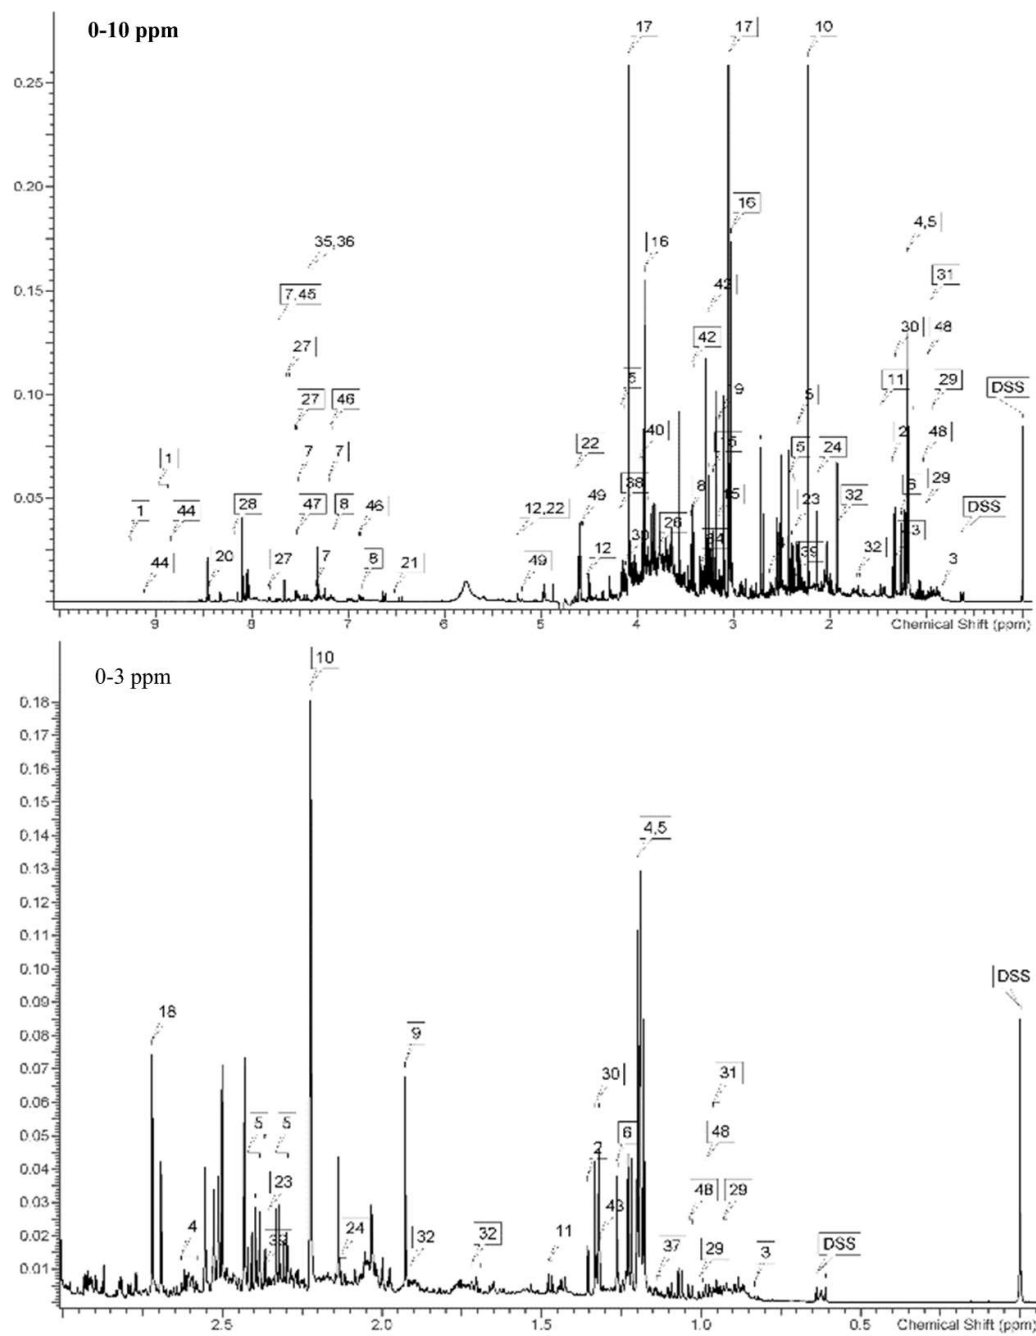

**Figure S1 Representative spectra of urine samples continued**

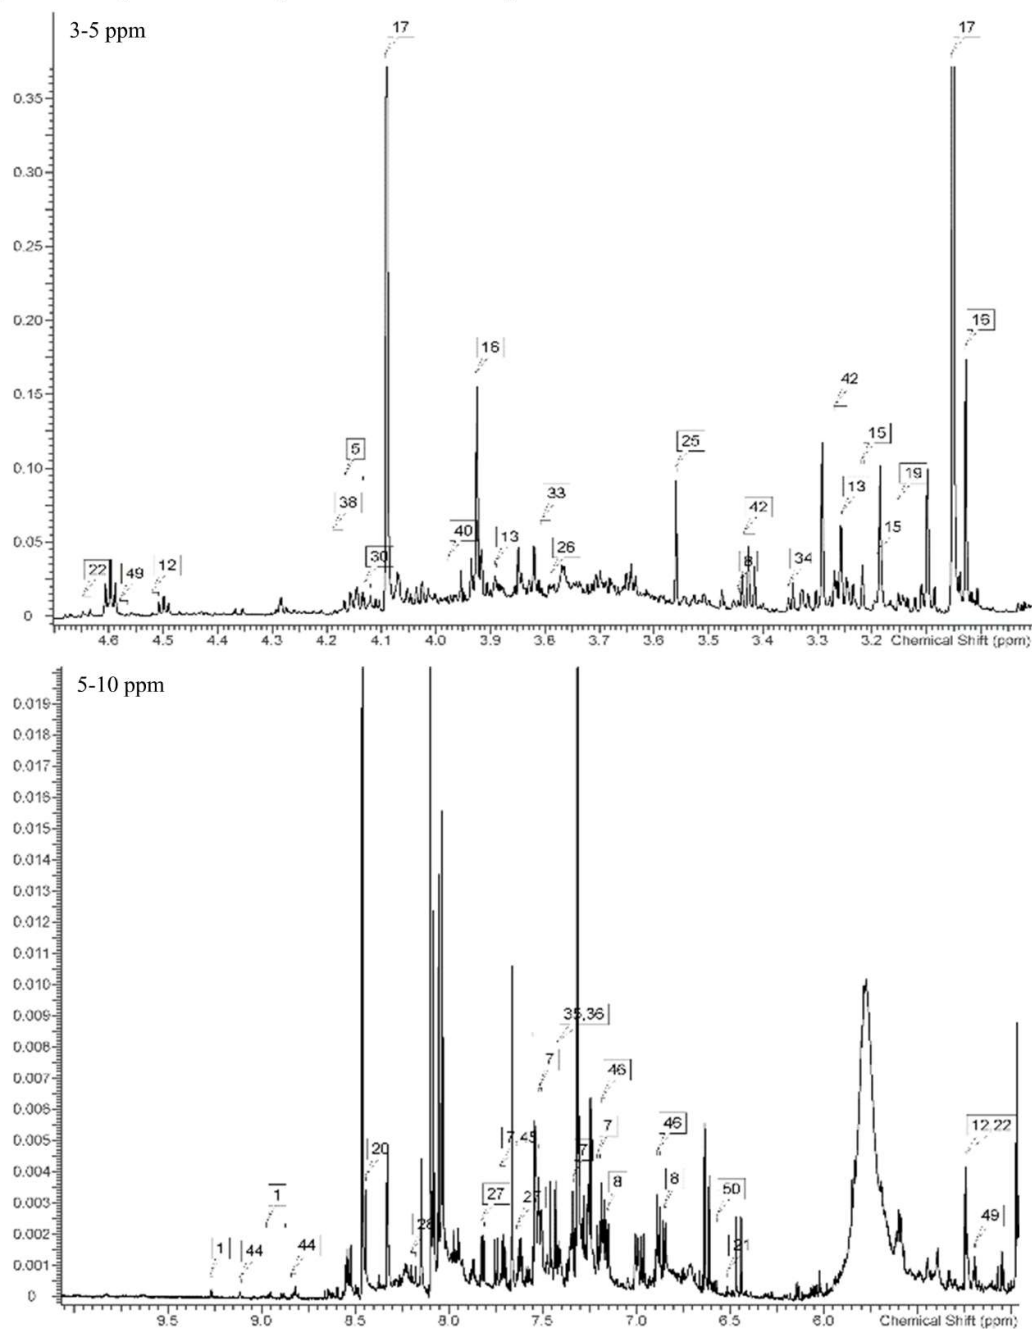

**Figure S1 Representative spectra of selected metabolites.** NMR spectra are presented at different detection ranges including total range 0-10 ppm, subranges 0-3, 3-5 and 5-10 ppm. The corresponding metabolite of each number is summarized in Table S1.

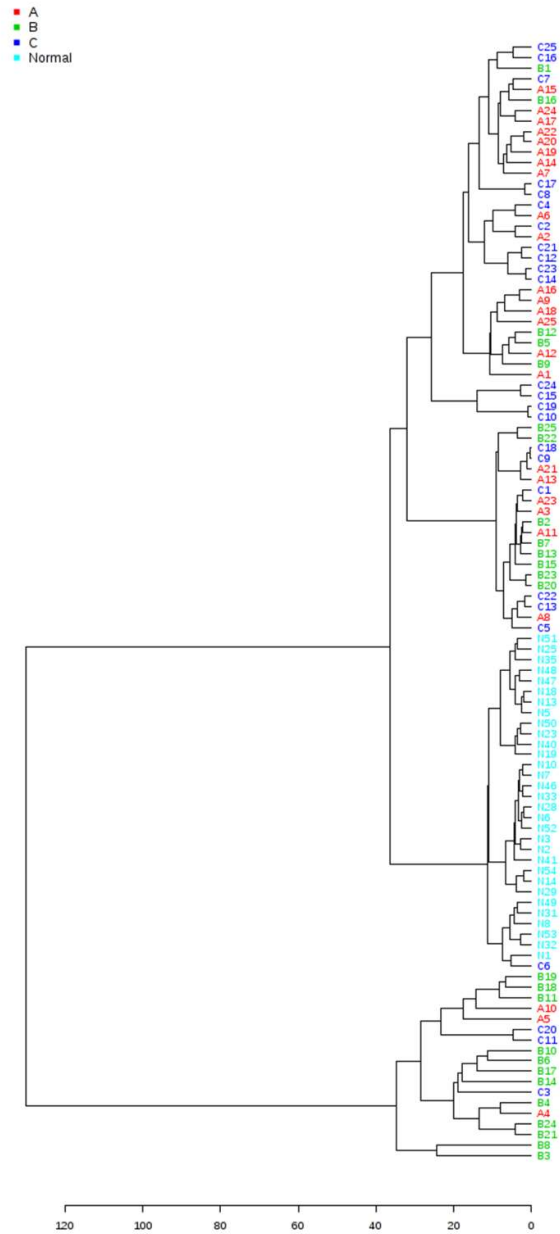

**Figure S2 Cluster analysis of all samples in this study.** Group A, pre-surgery CR patients; Group B, post-operative CRC patients; Group C, post-chemotherapy CRC patients; Group N, healthy individuals.
