# Supplementary material for: Metabolomic Comparison of Patients With Colorectal Cancer at Different Anticancer Treatment Stages
Source: PubMed Central journal article supplement (PMC8855116; doi:10.3389/fonc.2021.574318), 2022-02-04
Supplement: Table_1.pdf [file Table_1.pdf]

Table S1 Information of metabolites detected by NMR

| Metabolites            | Spectrum No. | Class                   |
|------------------------|--------------|-------------------------|
| 1-Methylnicotinamide   | 1            | vitamin/cofactors       |
| 2-Hydroxyisobutyrate   | 2            | organic acids           |
| 2-Hydroxyisovalerate   | 3            | organic acids           |
| 3-Aminoisobutyrate     | 4            | amino acids             |
| 3-Hydroxybutyrate      | 5            | organic acids           |
| 3-Hydroxyisovalerate   | 6            | organic acids           |
| 3-Indoxylsulfate       | 7            | amino acid derivatives  |
| 4-Hydroxyphenylacetate | 8            | organic acids           |
| Acetate                | 9            | organic acids           |
| Acetone                | 10           | ketones                 |
| Alanine                | 11           | amino acids             |
| Arabinose              | 12           | sugars                  |
| Betaine                | 13           | amino acids             |
| Carnitine              | 14           | amino acids             |
| Choline                | 15           | ammoniums compounds     |
| Creatine               | 16           | amino acid derivatives  |
| Creatinine             | 17           | amines                  |
| Dimethylamine          | 18           | amines                  |
| Ethanolamine           | 19           | amines                  |
| Formate                | 20           | organic acids           |
| Fumarate               | 21           | organic acids           |
| Glucose                | 22           | sugars                  |
| Glutamate              | 23           | amino acids             |
| Glutamine              | 24           | amino acids             |
| Glycine                | 25           | amino acids             |
| Guanidoacetate         | 26           | amino acid derivatives  |
| Hippurate              | 27           | amino acid derivatives  |
| Hypoxanthine           | 28           | nucleic acid components |
| Isoleucine             | 29           | amino acids             |
| Lactate                | 30           | organic acids           |
| Leucine                | 31           | amino acids             |
| Lysine                 | 32           | amino acids             |
| Mannitol               | 33           | sugars                  |
| Methanol               | 34           | alcohols                |
| N-Phenylacetylglycine  | 35           | amides                  |
| Phenylalanine          | 36           | amino acids             |
| Propylene glycol       | 37           | alcohols                |
| Pyroglutamate          | 38           | amino acid derivatives  |
| Pyruvate               | 39           | organic acids           |
| Serine                 | 40           | amino acids             |
| Succinate              | 41           | organic acids           |
| Taurine                | 42           | amino acids             |
| Threonine              | 43           | amino acids             |
| Trigonelline           | 44           | food and drug compounds |
| Tryptophan             | 45           | amino acids             |
| Tyrosine               | 46           | amino acids             |
| Uracil                 | 47           | nucleic acid components |
| Valine                 | 48           | amino acids             |
| Xylose                 | 49           | sugars                  |
| trans-Aconitate        | 50           | organic acids           |
